# Supplementary material
Source: publisher figshare collection journal article supplement (https://tandf.figshare.com/ndownloader/files/12382292)
Supplement: Supplementary file 1 [file 12382292]

## **Supplementary Information**

### **Review of progress with integrated coastal management in South Africa since the advent of democracy**

M Sowman and N Malan

*African Journal of Marine Science* 2018, 40(2): 121–136.

<https://doi.org/10.2989/1814232X.2018.1468278>

**Appendix S1:** The survey questionnaire sent out, in 2014, to 350 coastal managers (drawn from local, provincial and national government; NGOs; academics; and private-sector coastal planners) in South Africa, of which 75 were completed (22% response rate)

## Supplement Appendix 1: Progress with ICM in South Africa since 1994

1. How familiar are you with the content of the White Paper for Sustainable Coastal development in South Africa?

Very familiar

Quite familiar

Not at all familiar

2. How familiar are you with the content of the Integrated Coastal Management Act (ICM Act)?

Very familiar

Quite familiar

Not at all familiar

3. Have you ever referred to the principles, goals and objectives in the Coastal White Paper when developing a policy, programmes, plan or project or making a decision?

4. To what extent has the Department of Environmental Affairs fulfilled their mandate in terms of the ICM Act?

5. Who is the lead agency in your province responsible for implementing ICMA?

6. What actions have your province taken to implement requirements of the ICM Act?

Yes

No

In Progress

Developed a Coastal  
Management  
Programme

Developed Estuary  
Management Plans  
for all estuaries

Identified Coastal  
Protection Zone

Established a  
Provincial Coastal  
Committee

Developed setback lines

Held ICM awareness  
raising events or run  
campaigns for public

Conducted ICM  
training in Province

Other

7. What actions has your municipality taken to implement requirements of the ICMA?

Yes

No

In Progress

Designation of  
Coastal Access  
land  
Established  
Municipal Coastal  
Committee  
Awareness raising  
and education  
Other

### 8. What are the key challenges to implementing the ICM Act?

(Tick all answers you agree with, insert additional challenges if necessary)

Too complex for coastal management agencies to

implement Lack of capacity

Lack of resources (budget, human resources,  
equipment) Implementation of certain provisions,  
challenges, property rights Lack of co-operative  
governance

Restructuring of DEA and DAFF created confusion and led to delays in  
implementation

Other:







### 9. To what extent are coastal issues and principles informing other statutory plans (e.g. IDPs, SDFs) and decisions that have an effect on coasts

To a large extent

Somewhat

Very minimally

Not at all

### 10. A key principle of the ICMA is to enhance coastal access to the coast for all South Africans. In your view has this happened?

Done

Powered by **SurveyMonkey**  
Check out our [sample surveys](#) and create your own now!
